# Supplementary material for: Performance Efficiency of Conventional Treatment Plants and Constructed Wetlands towards Reduction of Antibiotic Resistance
Source: MDPI journal article supplement (doi:10.3390/antibiotics11010114), 2022-01-16
Supplement: s1 [file s1]

## Supplementary material

### Performance Efficiency of Conventional Treatment Plants and Constructed Wetlands towards reduction of Antibiotic Resistance

Moushumi Hazra<sup>1\*</sup>, Lisa Durso<sup>2</sup>

<sup>\*1</sup>Institute Post-Doctoral Fellow, Department of Hydrology, Indian Institute of Technology, Roorkee, Uttarakhand, India, <sup>#2</sup> Research Microbiologist, United States Department of Agriculture, Lincoln, NE

Corresponding author: Moushumi Hazra <sup>1\*</sup>

Email: moushmihazra@gmail.com /moushumi.pd@hy.iitr.ac.in

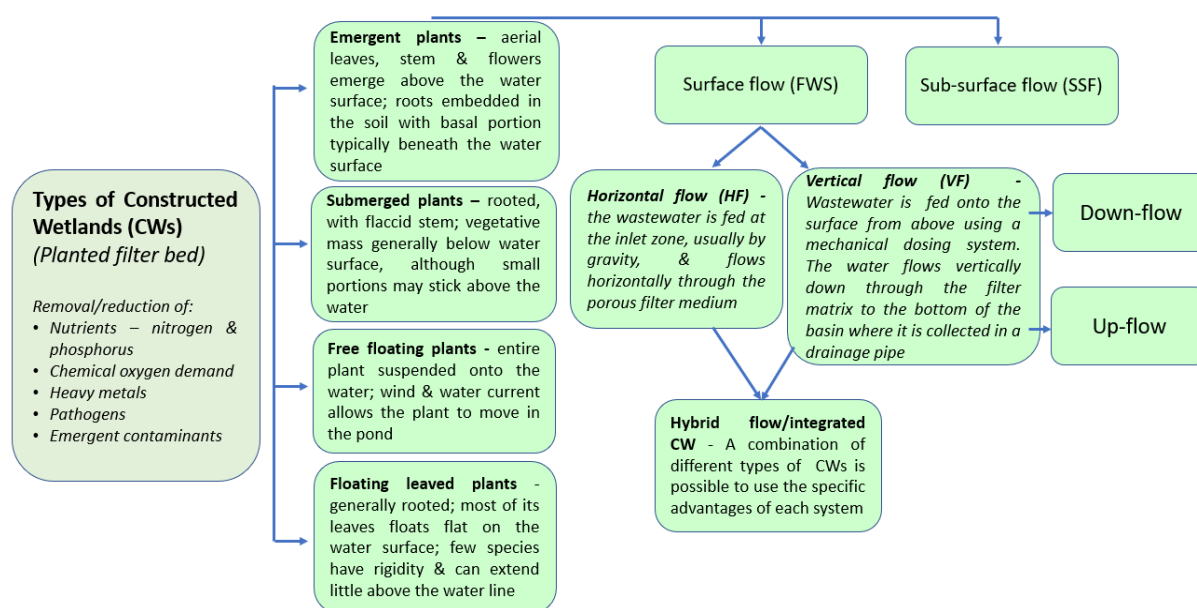

**Figure S1:** Types of Constructed wetlands according to their designs and specifications

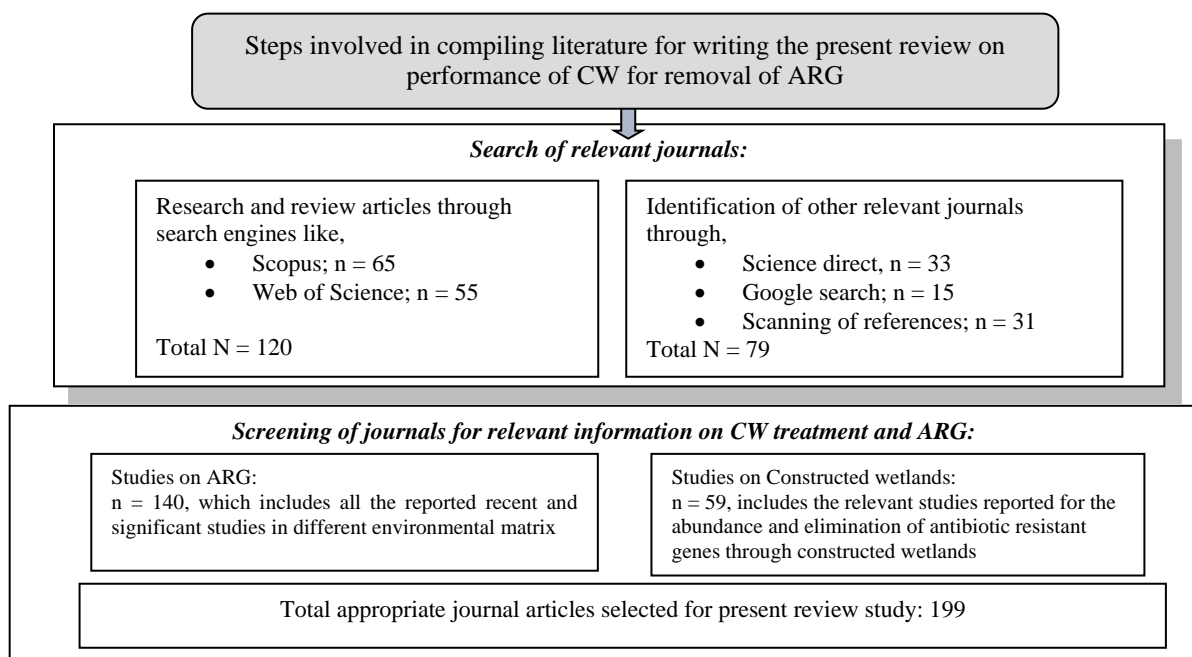

**Figure S2:** Flow chart to demonstrate the steps involved for writing the present review

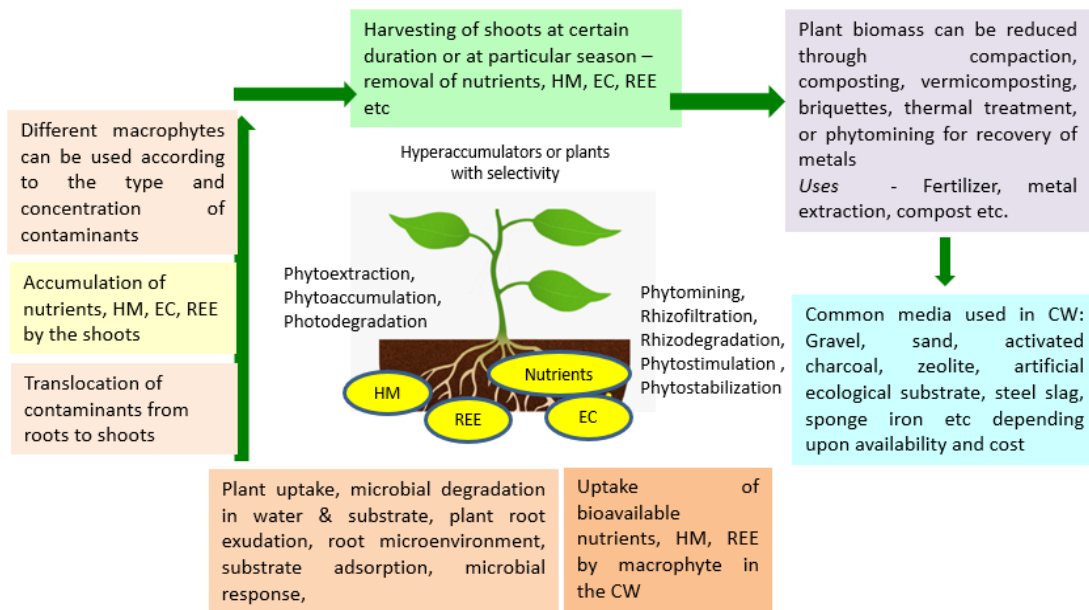

**Figure S3:** Role of macrophytes in Constructed wetlands (Note; HM-heavy metals; EC-emerging contaminants; REE-rare earth metals; CW-constructed wetlands)

**Table S1: Comparative techno-economical assessment of target technologies based on suitability of reuse**

| Parameter                                                                                 | Target compounds | Technology                                                                                                                                                                                                                                                                    |                                                                                                                                                                                                                               |                                                                                                                      |
|-------------------------------------------------------------------------------------------|------------------|-------------------------------------------------------------------------------------------------------------------------------------------------------------------------------------------------------------------------------------------------------------------------------|-------------------------------------------------------------------------------------------------------------------------------------------------------------------------------------------------------------------------------|----------------------------------------------------------------------------------------------------------------------|
|                                                                                           |                  | <b>CW</b>                                                                                                                                                                                                                                                                     | <b>MBR</b>                                                                                                                                                                                                                    | <b>Activated Sludge</b>                                                                                              |
| Performance efficiency (%)                                                                | Pharmaceuticals  | 0–99%                                                                                                                                                                                                                                                                         | <0–99%                                                                                                                                                                                                                        | 94–98%                                                                                                               |
|                                                                                           | Antibiotics      | 0–100%                                                                                                                                                                                                                                                                        | <0–99%                                                                                                                                                                                                                        | 90%                                                                                                                  |
| Need of post-treatment                                                                    |                  | Yes/No                                                                                                                                                                                                                                                                        | No                                                                                                                                                                                                                            | Yes                                                                                                                  |
| Complexity in operation                                                                   |                  | Requires maintenance Ease in operation/management                                                                                                                                                                                                                             | Technical and skilled staff required. High process automation                                                                                                                                                                 | Skilled staff required                                                                                               |
| Complexity in lay out/Ease of construction                                                |                  | Easy to construct, also commercially available                                                                                                                                                                                                                                | Commercially available                                                                                                                                                                                                        | Construction needed, treats carbon and nitrogen compounds                                                            |
| Flexibility/reliability                                                                   |                  | Not flexibility, and not possible to change the design and geo-textile materials. Resilient to fluctuations in flow and shock loads. Affected by temperature                                                                                                                  | Flexibility in design with modular setup. Resilient to inflow fluctuations and shock loads                                                                                                                                    | Not resilient to disturbances and toxic loading. Affected by pH, temperature, oxygen, nitrite, ammonia concentration |
| Footprint                                                                                 |                  | Large areas for construction are required                                                                                                                                                                                                                                     | Feasibility in reduction of space possible, Small footprint                                                                                                                                                                   | Large area required                                                                                                  |
| Environmental aspects (waste production, disposal, chemicals)                             |                  | Pretreatment may be required based on the type of WW to avoid clogging. No post treatment required. Treated effluent can be directly discharged to water bodies. Sludge generated from primary treatment may be used as fertilizer with post treatment such as by adding alum | Treatment of concentrate and sludge required                                                                                                                                                                                  | Efficient for treating industrial wastewater                                                                         |
| Investment cost                                                                           |                  | Very low as locally available plant species and substrate can be used. Demolition waste, bricks, marble remains can also be used                                                                                                                                              | Membrane costly approximately 40 – 60% of total capital costs. Chemicals are required for membrane cleaning                                                                                                                   | Cost related to construction and electricity consumption                                                             |
| Other factors that assist in maximizing the performance efficiency for removal of ARB/ARG |                  | Flow pattern governs the removal of ARB/ARG. Efficient in treating ARG and pathogens                                                                                                                                                                                          | Membrane needs to be replaced if fouling takes place to increase the performance efficiency. Accumulation of suspended colloidal particles on membrane. Better performance for microbial removal and for <i>int1</i> and ARGs | Sludge contains ARG that gets disseminated in soil and finally water bodies                                          |
| Use in treatment technologies                                                             |                  | Used as tertiary treatment or for polishing of effluents                                                                                                                                                                                                                      | Used as tertiary treatment                                                                                                                                                                                                    | Used for secondary treatment                                                                                         |
